# Supplementary material
Source: ML conference proceedings conference paper supplement (https://aclanthology.org/2026.bionlp-2.28)

# Zero-Shot Confusion Matrix — Llama-3.1-8B-Instruct

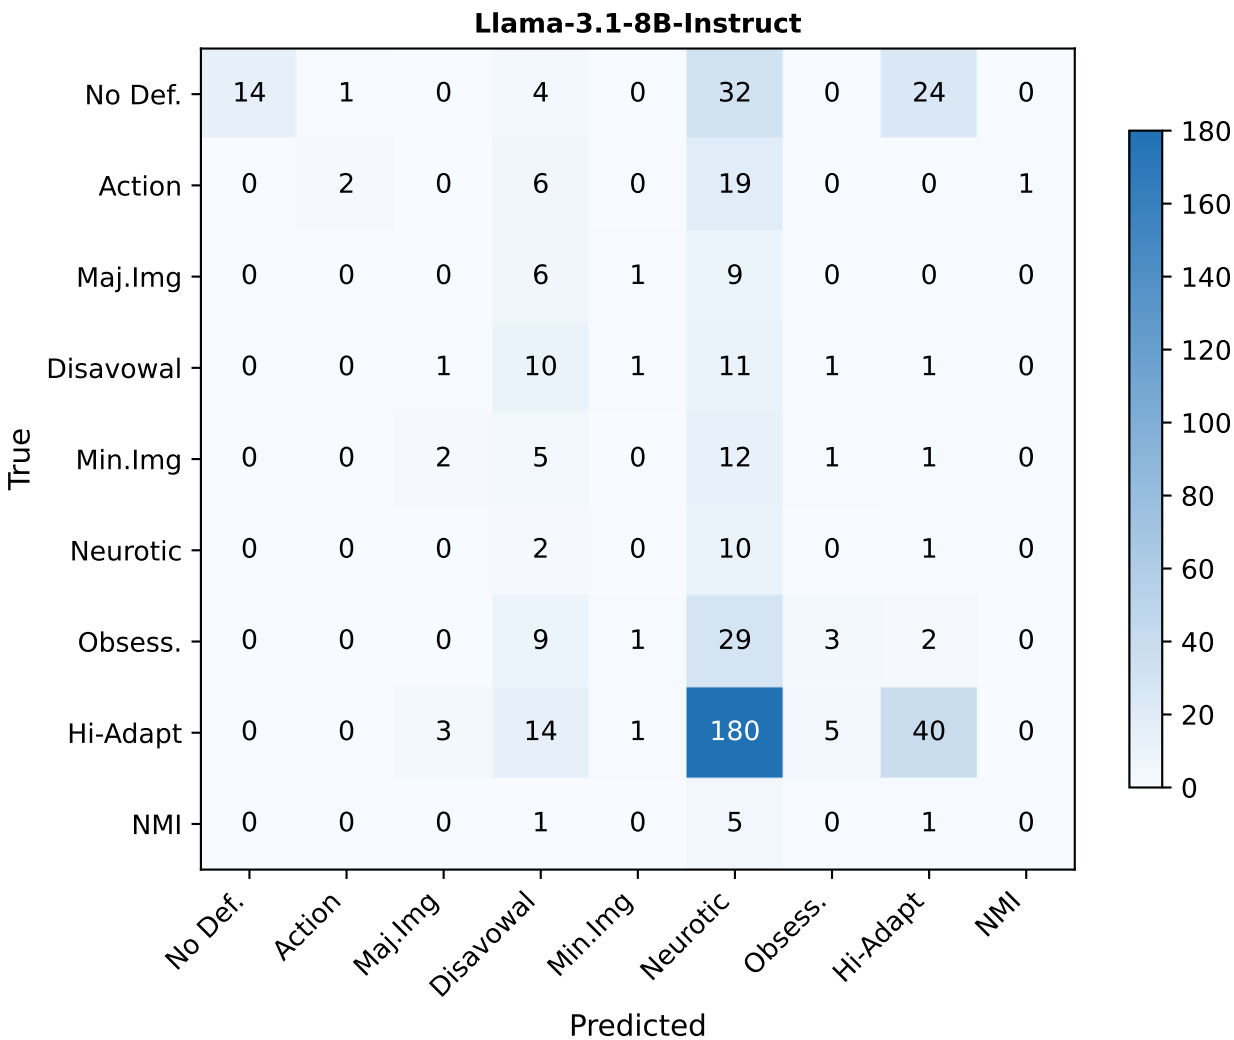

Supplement: SupplementaryMaterial [file 01_zs_confusion_Llama-3.1-8B-Instruct.pdf › AlienAnnotators_TeX/plots/01_zs_confusion_Llama-3.1-8B-Instruct.pdf]

# Zero-Shot Confusion Matrix — Llama-3.2-1B-Instruct

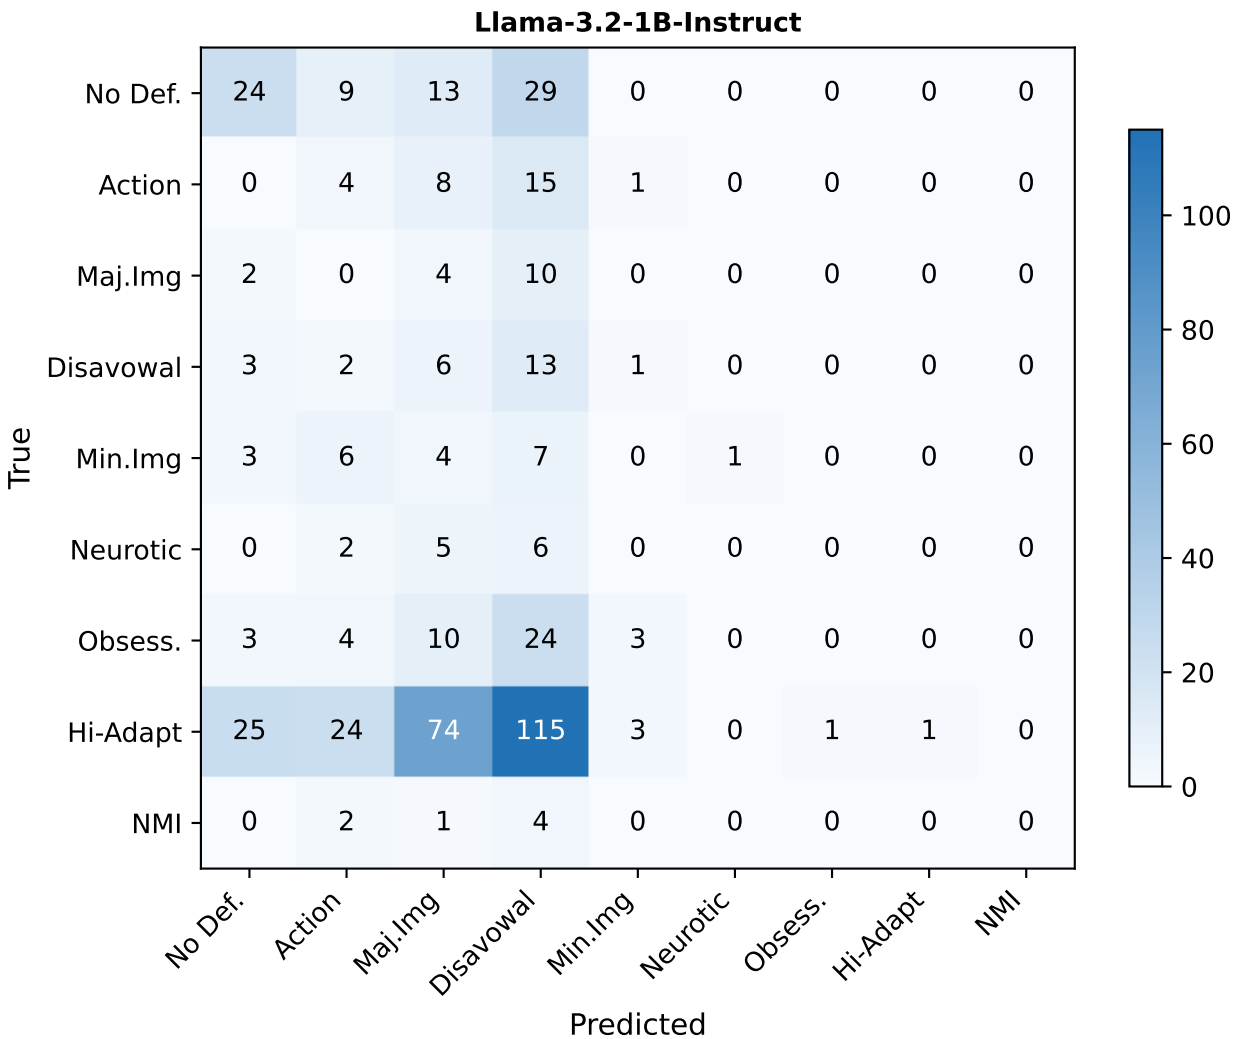

Supplement: SupplementaryMaterial [file 01_zs_confusion_Llama-3.2-1B-Instruct.pdf › AlienAnnotators_TeX/plots/01_zs_confusion_Llama-3.2-1B-Instruct.pdf]

# Zero-Shot Confusion Matrix — Qwen3-1.7B

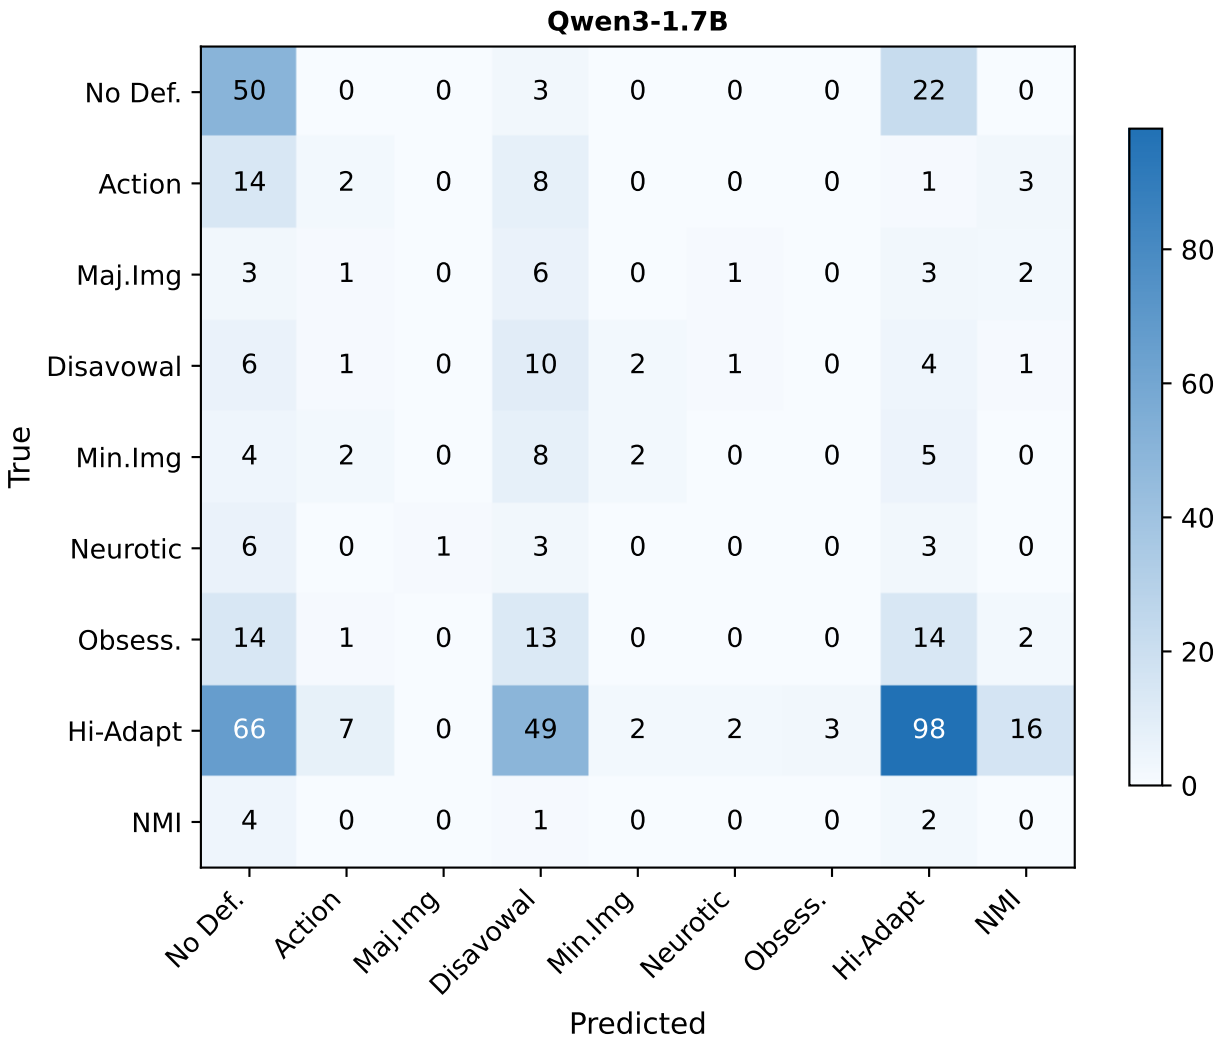

Supplement: SupplementaryMaterial [file 01_zs_confusion_Qwen3-1.7B.pdf › AlienAnnotators_TeX/plots/01_zs_confusion_Qwen3-1.7B.pdf]

# Zero-Shot Confusion Matrix — Qwen3-8B

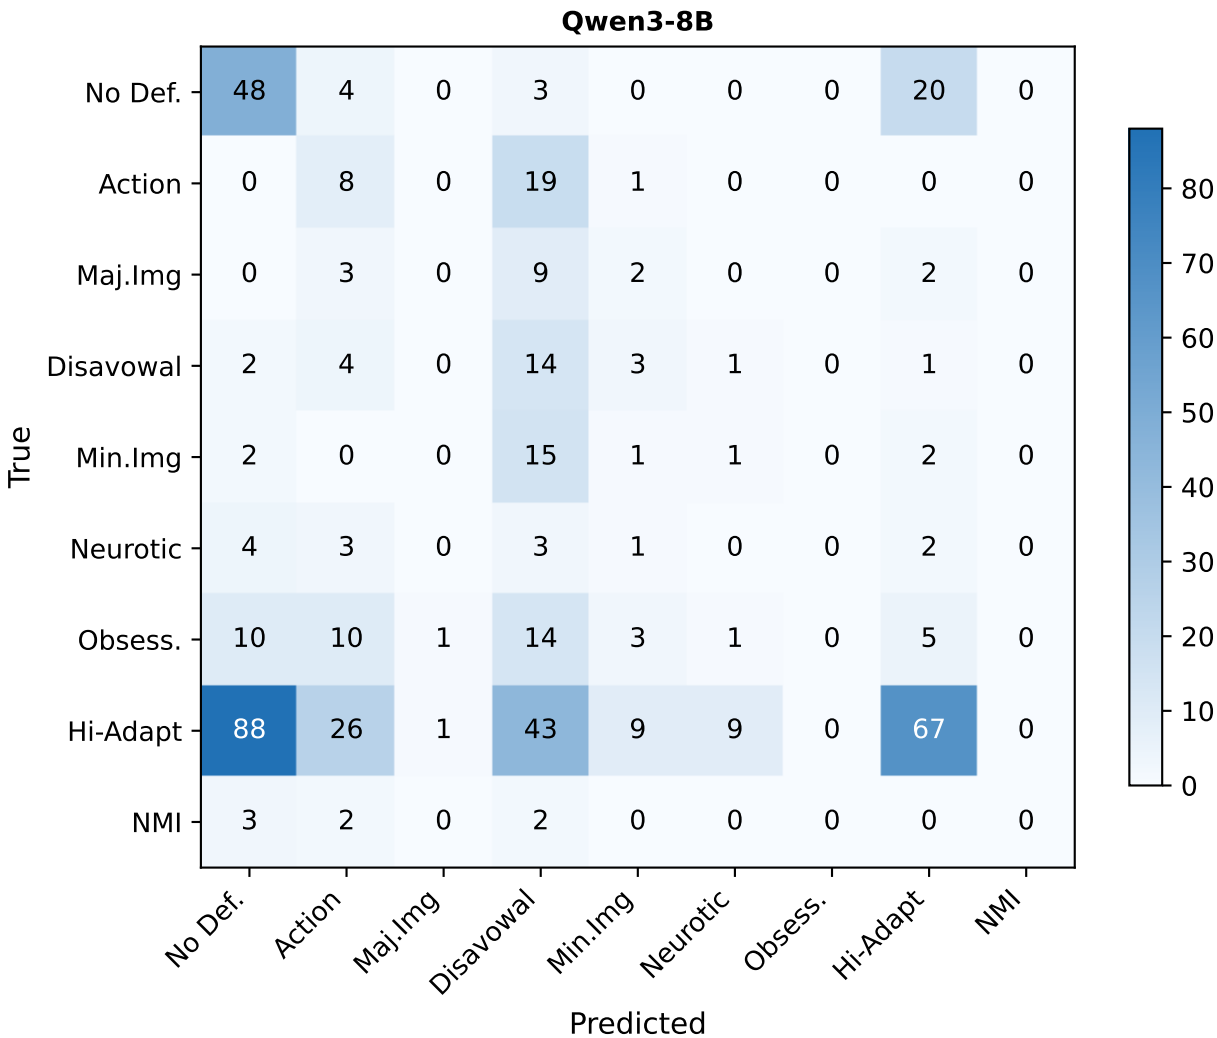

Supplement: SupplementaryMaterial [file 01_zs_confusion_Qwen3-8B.pdf › AlienAnnotators_TeX/plots/01_zs_confusion_Qwen3-8B.pdf]

# Zero-Shot Confusion Matrix — gemma-2-9b-it

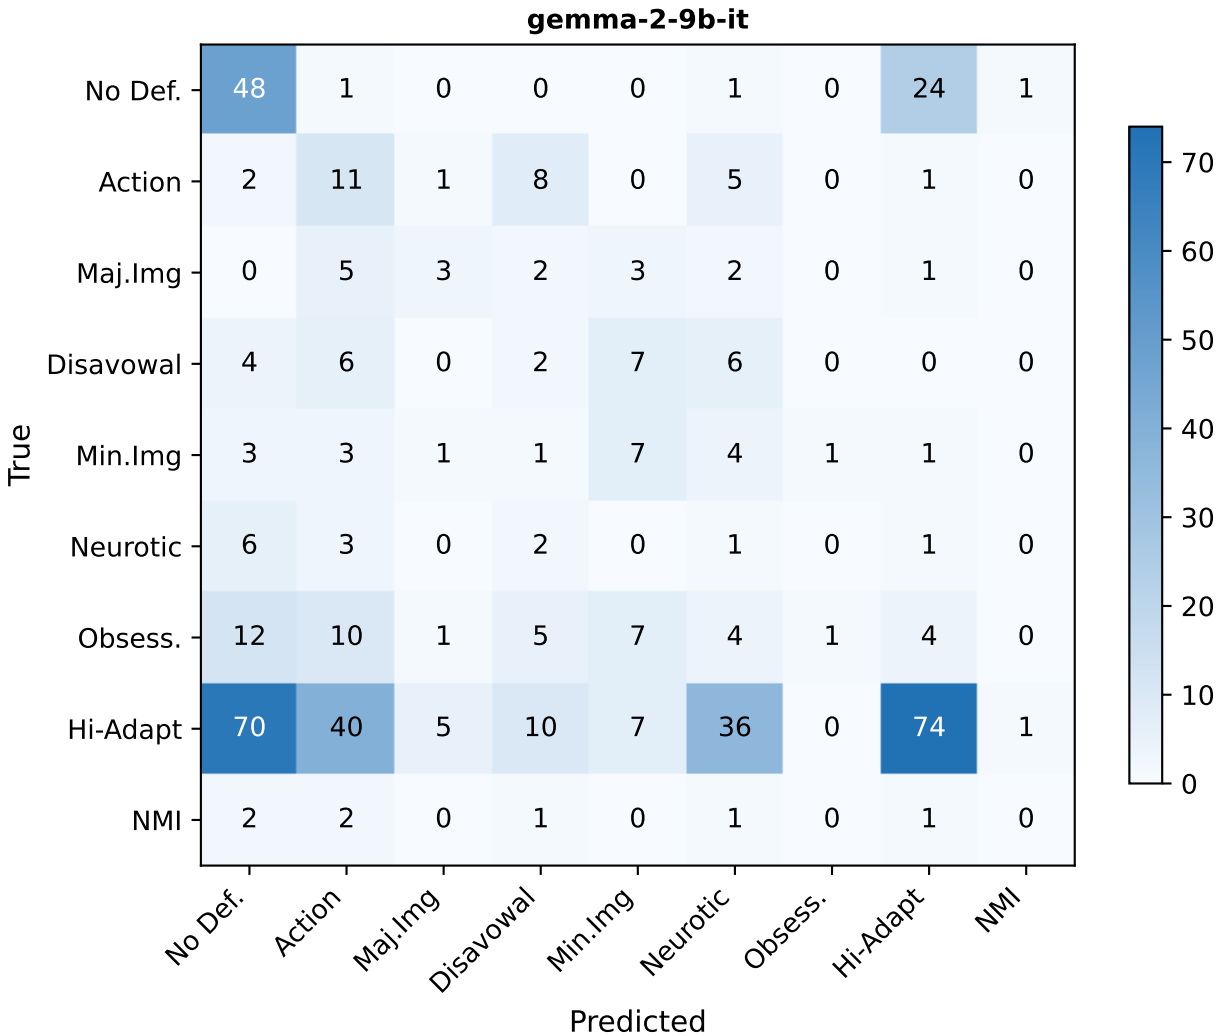

Supplement: SupplementaryMaterial [file 01_zs_confusion_gemma-2-9b-it.pdf › AlienAnnotators_TeX/plots/01_zs_confusion_gemma-2-9b-it.pdf]

# Zero-Shot Confusion Matrix — gemma-3-1b-it

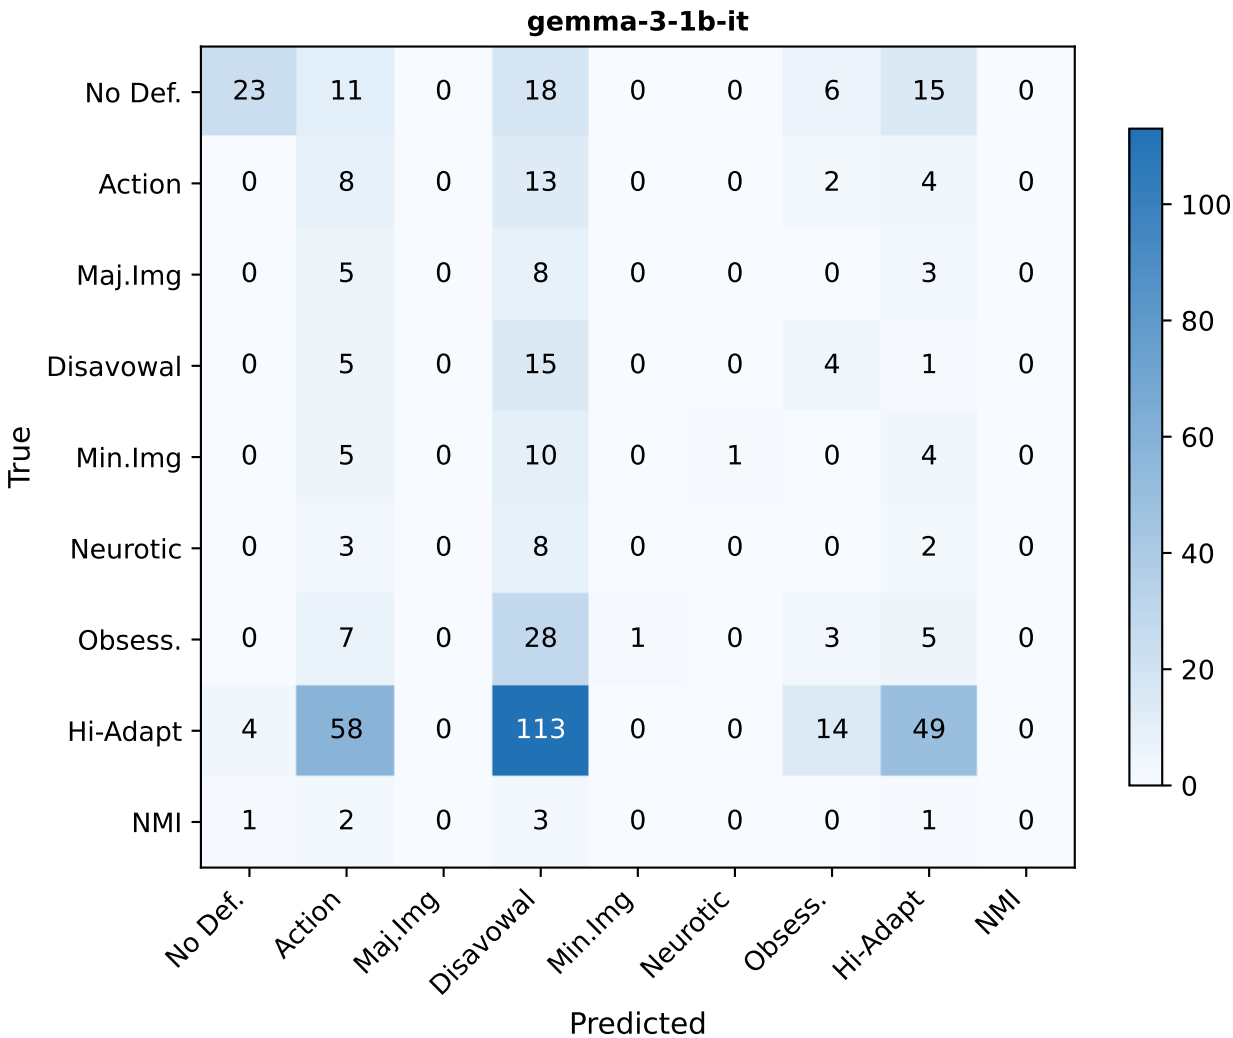

Supplement: SupplementaryMaterial [file 01_zs_confusion_gemma-3-1b-it.pdf › AlienAnnotators_TeX/plots/01_zs_confusion_gemma-3-1b-it.pdf]

# Finetuned: Gemma-3-1B-it — Best Fold (1)

Best Fold (1) | Macro F1=0.295

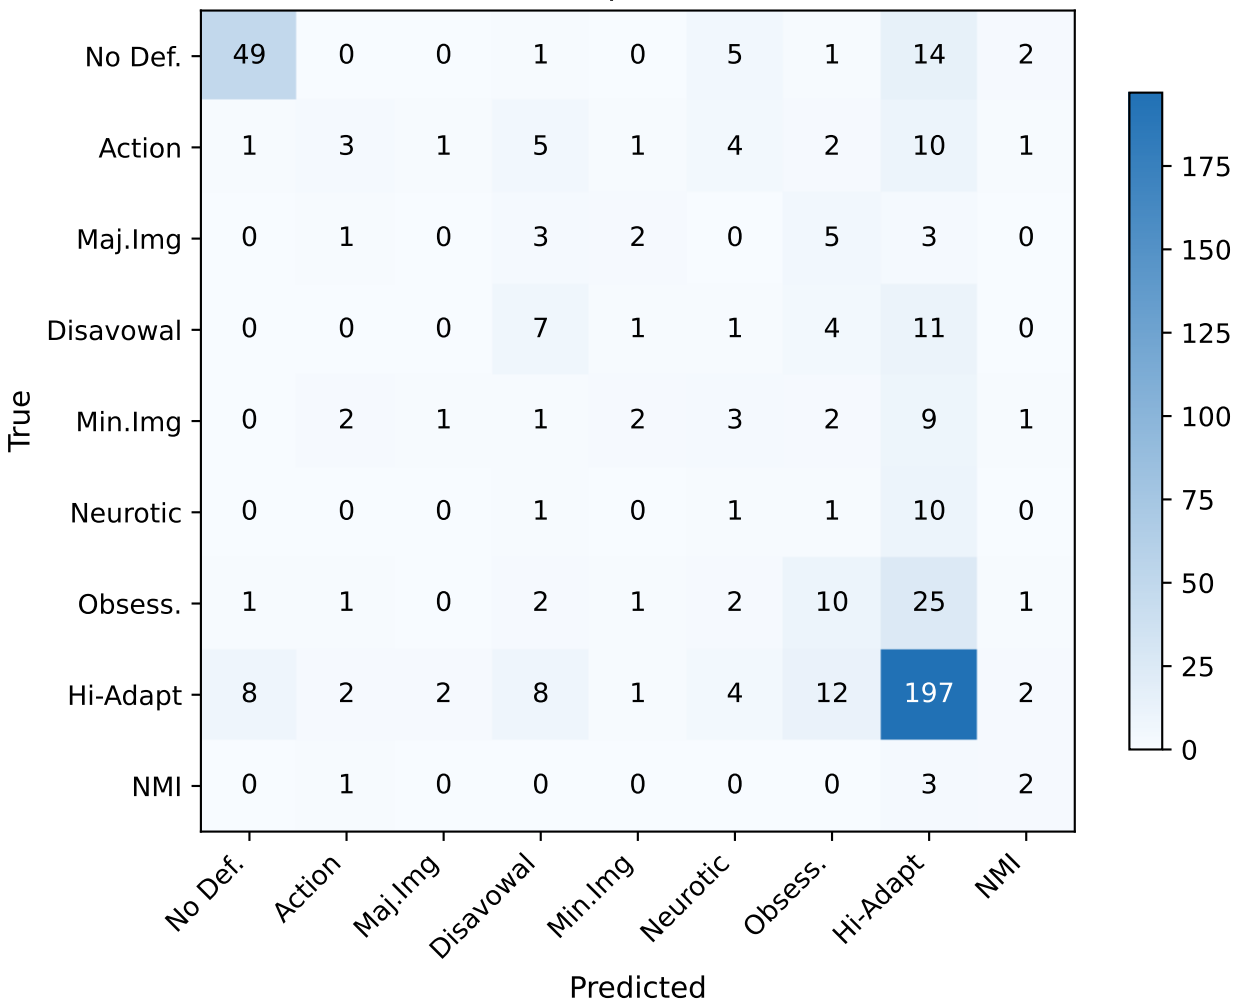

Supplement: SupplementaryMaterial [file 02_ft_confusion_Gemma-3-1B-it_Best_Fold_1.pdf › AlienAnnotators_TeX/plots/02_ft_confusion_Gemma-3-1B-it_Best_Fold_1.pdf]

# Finetuned: Gemma-3-1B-it — Logit Avg

Logit Avg | Macro F1=0.278

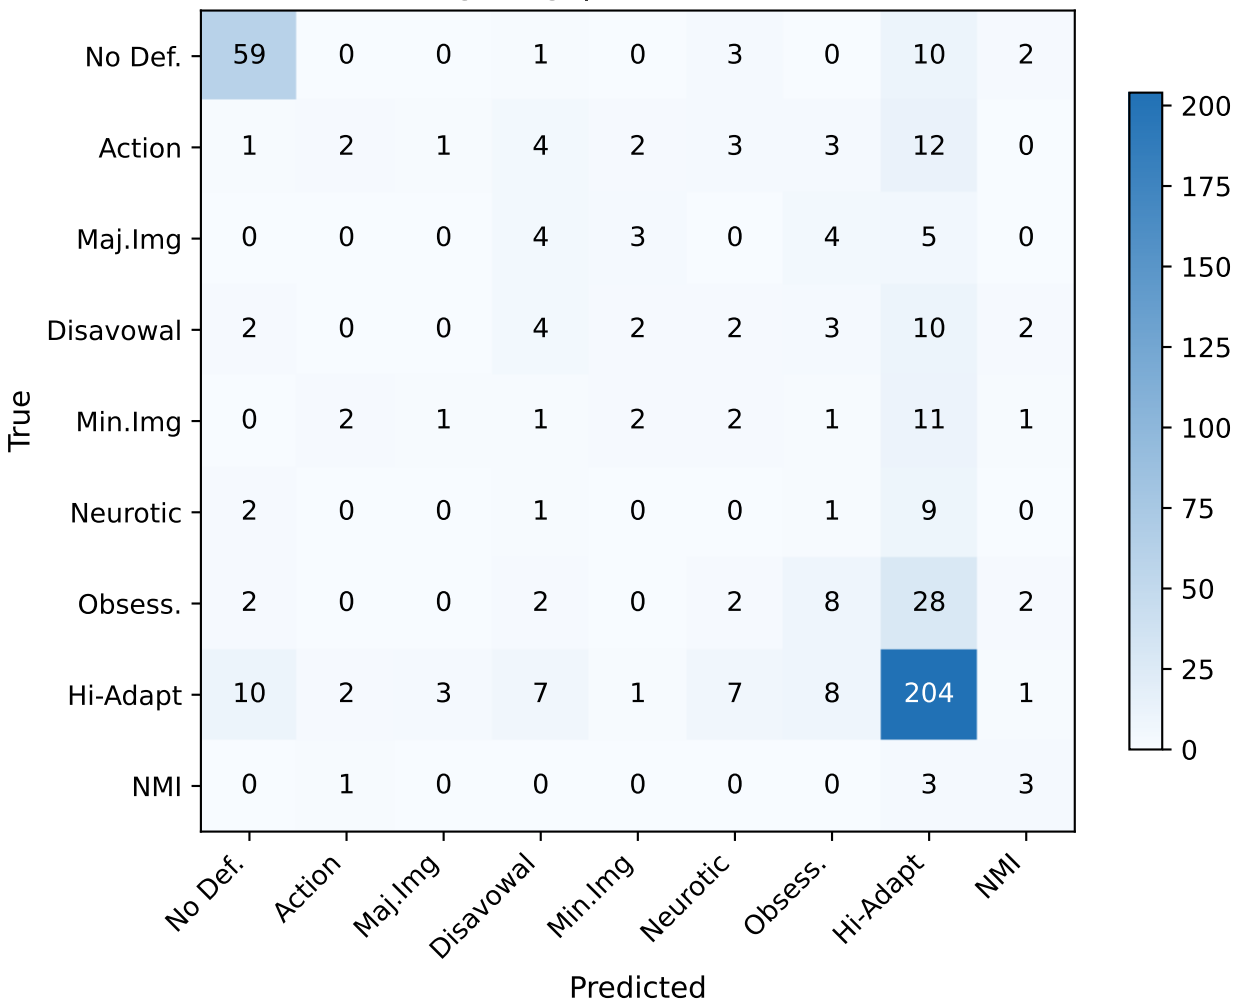

Supplement: SupplementaryMaterial [file 02_ft_confusion_Gemma-3-1B-it_Logit_Avg.pdf › AlienAnnotators_TeX/plots/02_ft_confusion_Gemma-3-1B-it_Logit_Avg.pdf]

# Finetuned: Gemma-3-1B-it — Majority Vote

Majority Vote | Macro F1=0.265

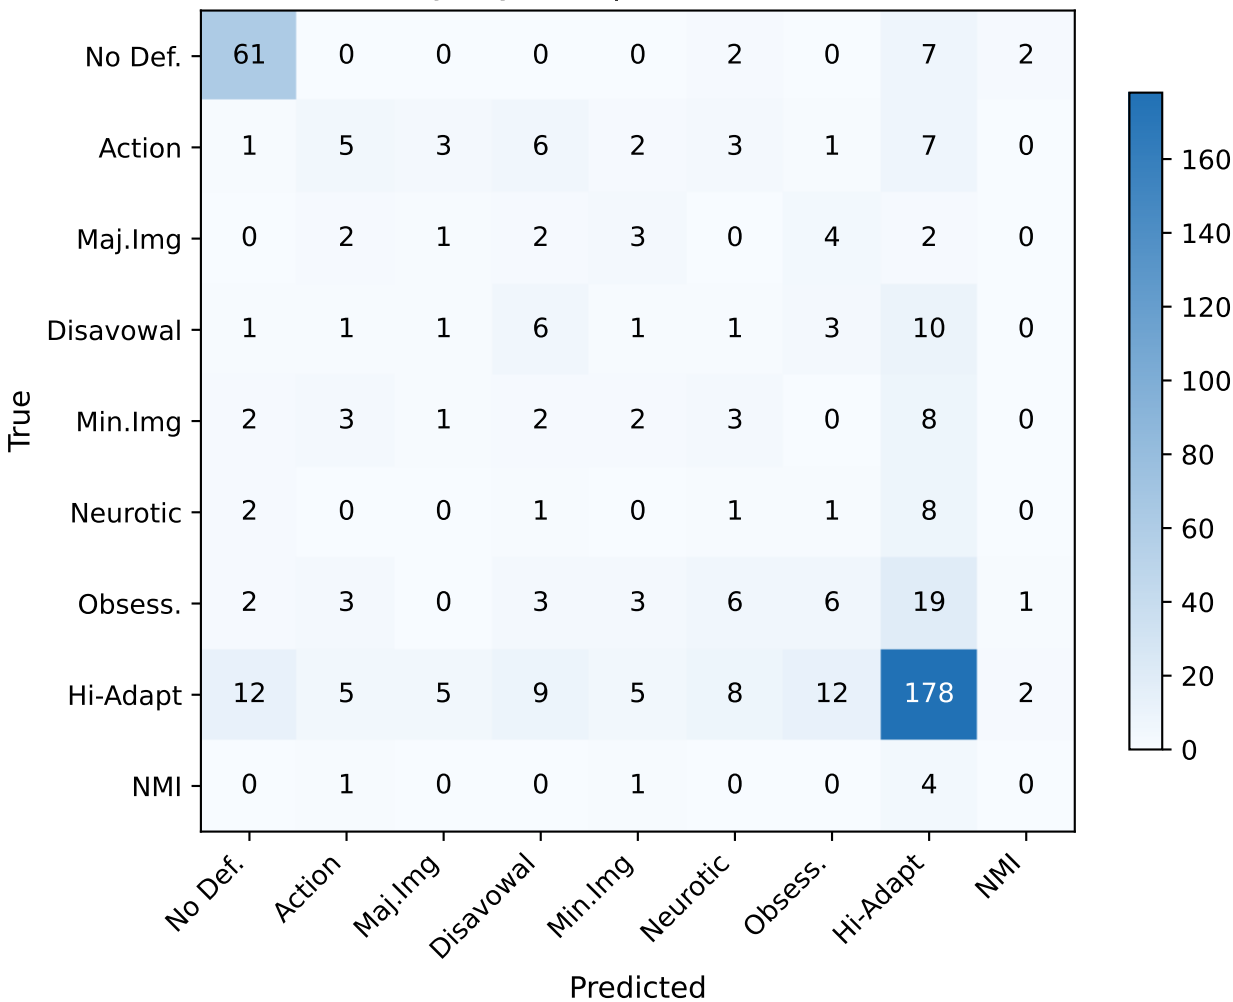

Supplement: SupplementaryMaterial [file 02_ft_confusion_Gemma-3-1B-it_Majority_Vote.pdf › AlienAnnotators_TeX/plots/02_ft_confusion_Gemma-3-1B-it_Majority_Vote.pdf]

# Finetuned: Llama-3.2-1B-Instruct — Best Fold (2)

Best Fold (2) | Macro F1=0.326

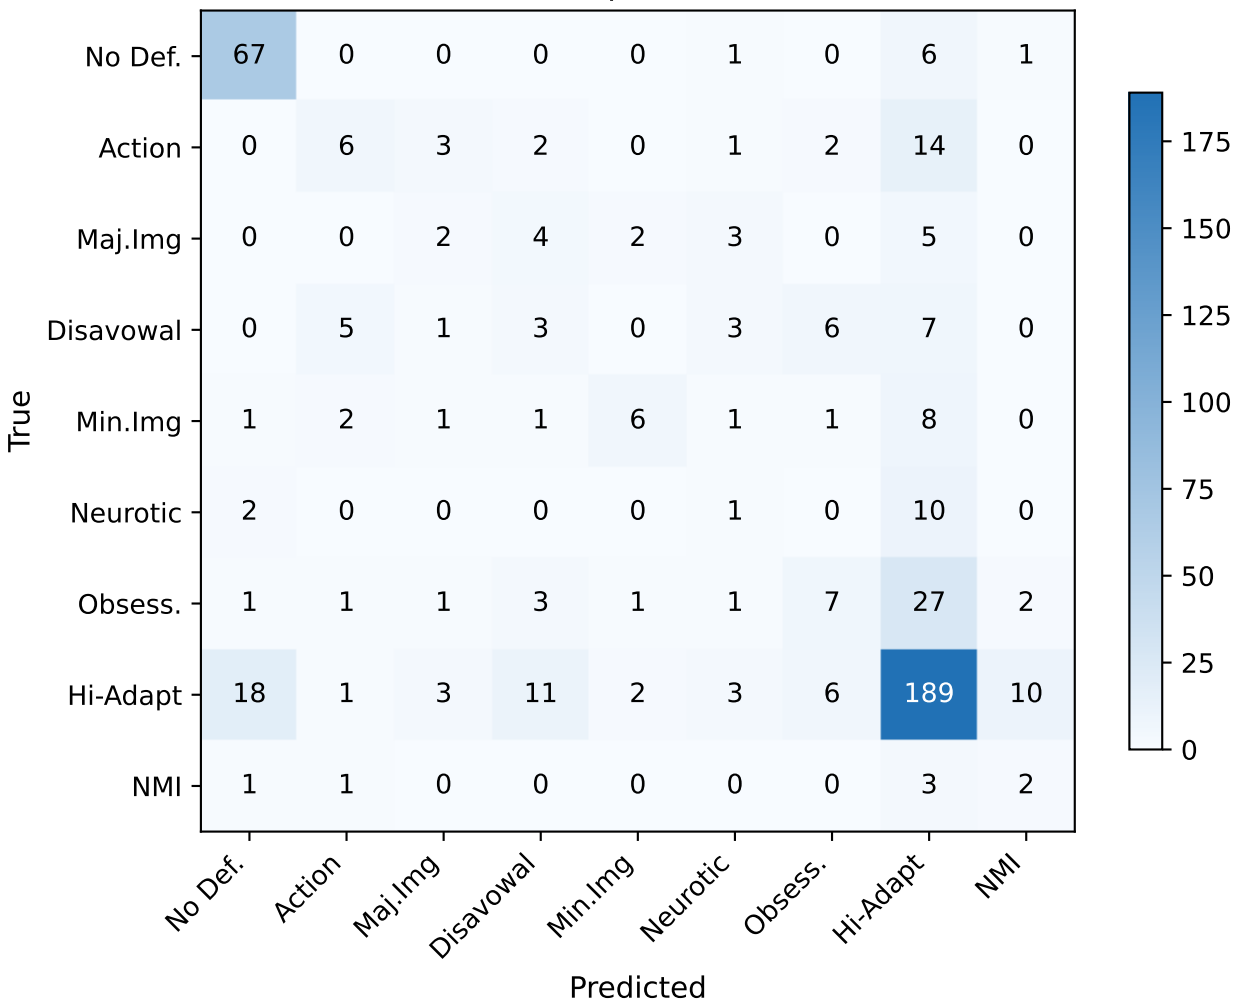

Supplement: SupplementaryMaterial [file 02_ft_confusion_Llama-3.2-1B-Instruct_Best_Fold_2.pdf › AlienAnnotators_TeX/plots/02_ft_confusion_Llama-3.2-1B-Instruct_Best_Fold_2.pdf]

# Finetuned: Llama-3.2-1B-Instruct — Logit Avg

Logit Avg | Macro F1=0.342

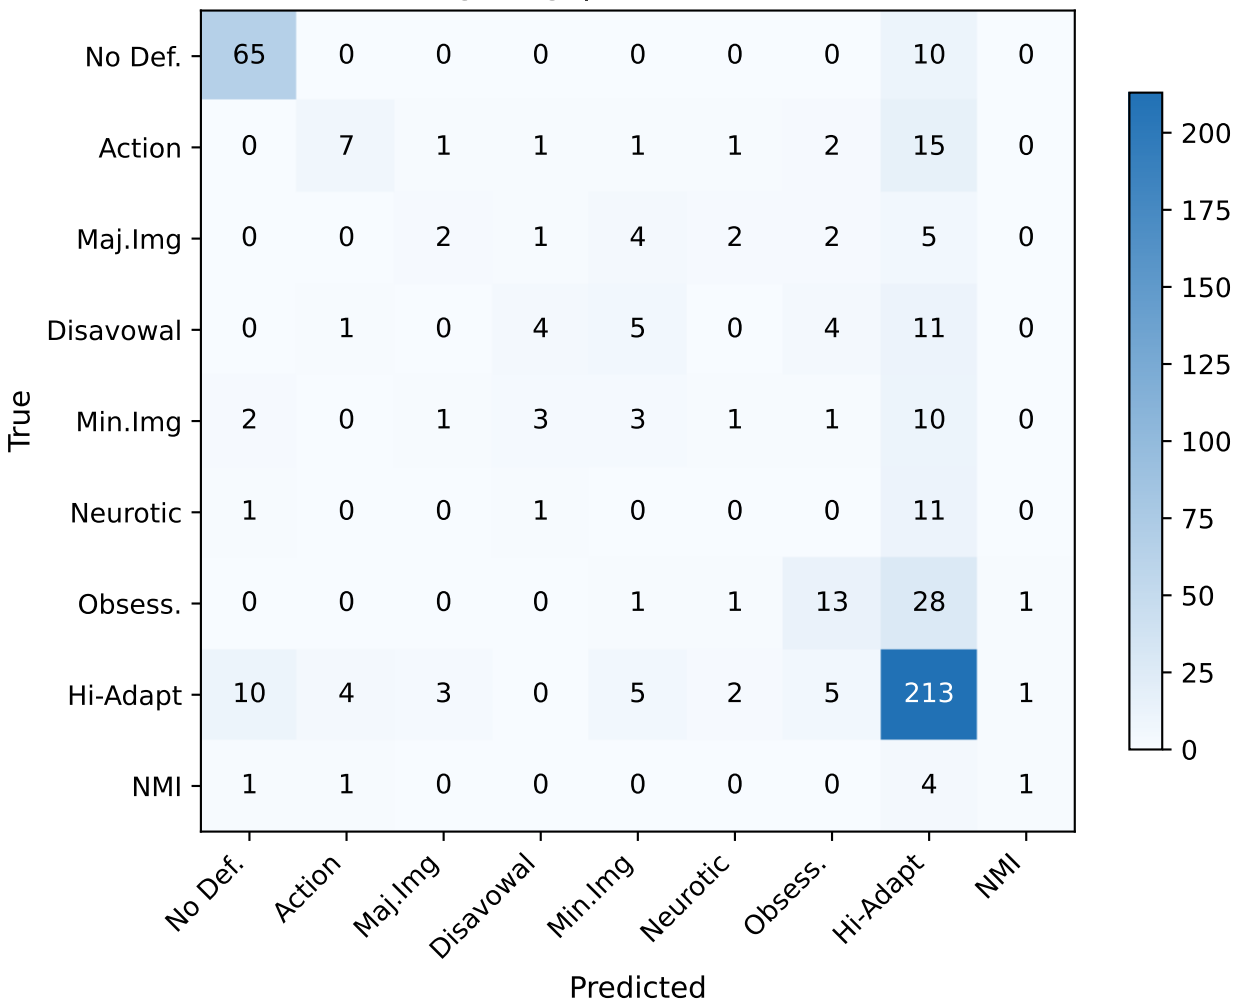

Supplement: SupplementaryMaterial [file 02_ft_confusion_Llama-3.2-1B-Instruct_Logit_Avg.pdf › AlienAnnotators_TeX/plots/02_ft_confusion_Llama-3.2-1B-Instruct_Logit_Avg.pdf]

# Finetuned: Llama-3.2-1B-Instruct — Majority Vote

Majority Vote | Macro F1=0.337

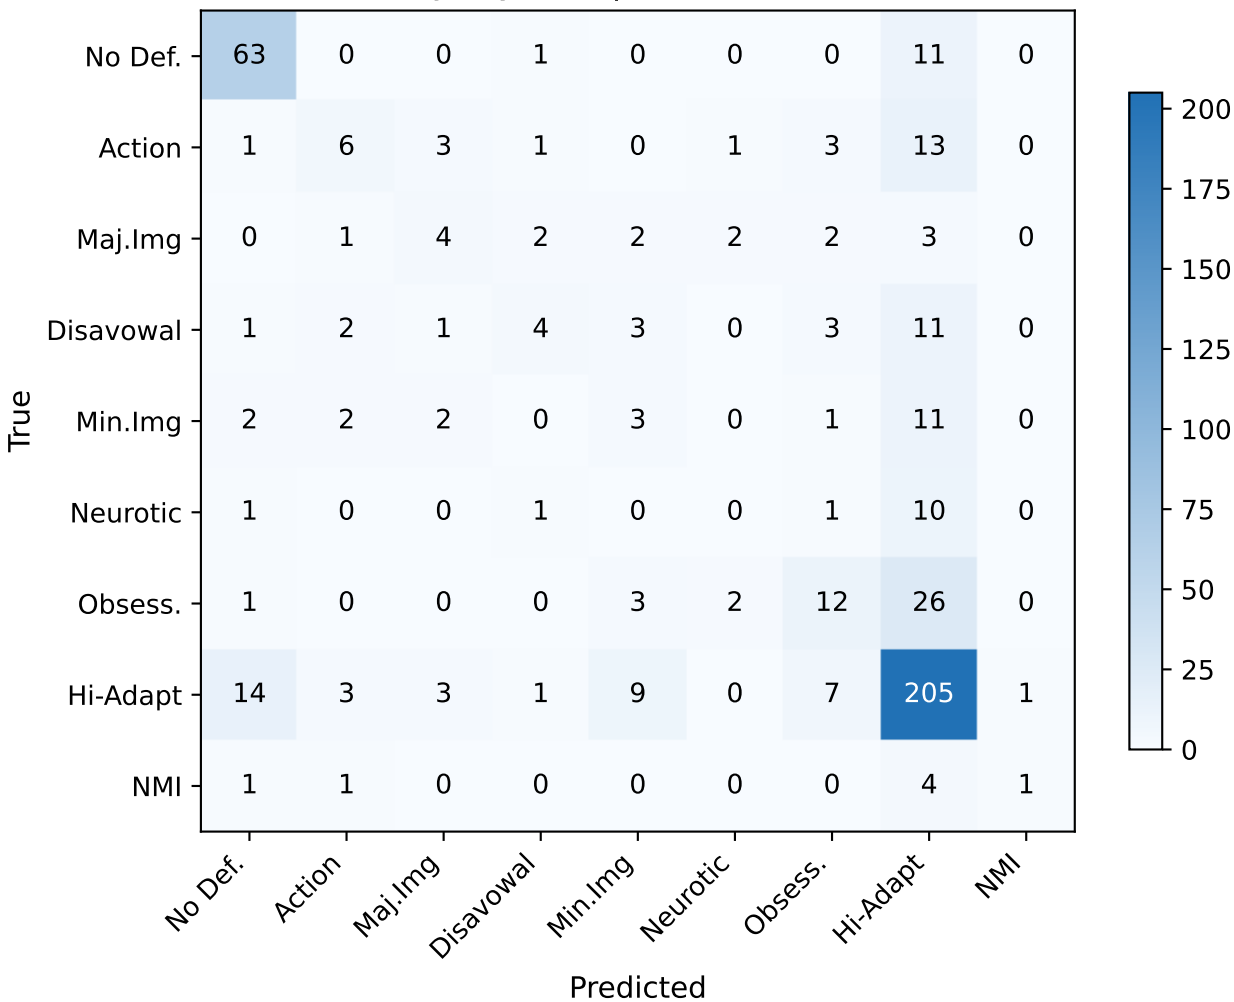

Supplement: SupplementaryMaterial [file 02_ft_confusion_Llama-3.2-1B-Instruct_Majority_Vote.pdf › AlienAnnotators_TeX/plots/02_ft_confusion_Llama-3.2-1B-Instruct_Majority_Vote.pdf]

# Finetuned: Qwen3-1.7B — Best Fold (2)

Best Fold (2) | Macro F1=0.335

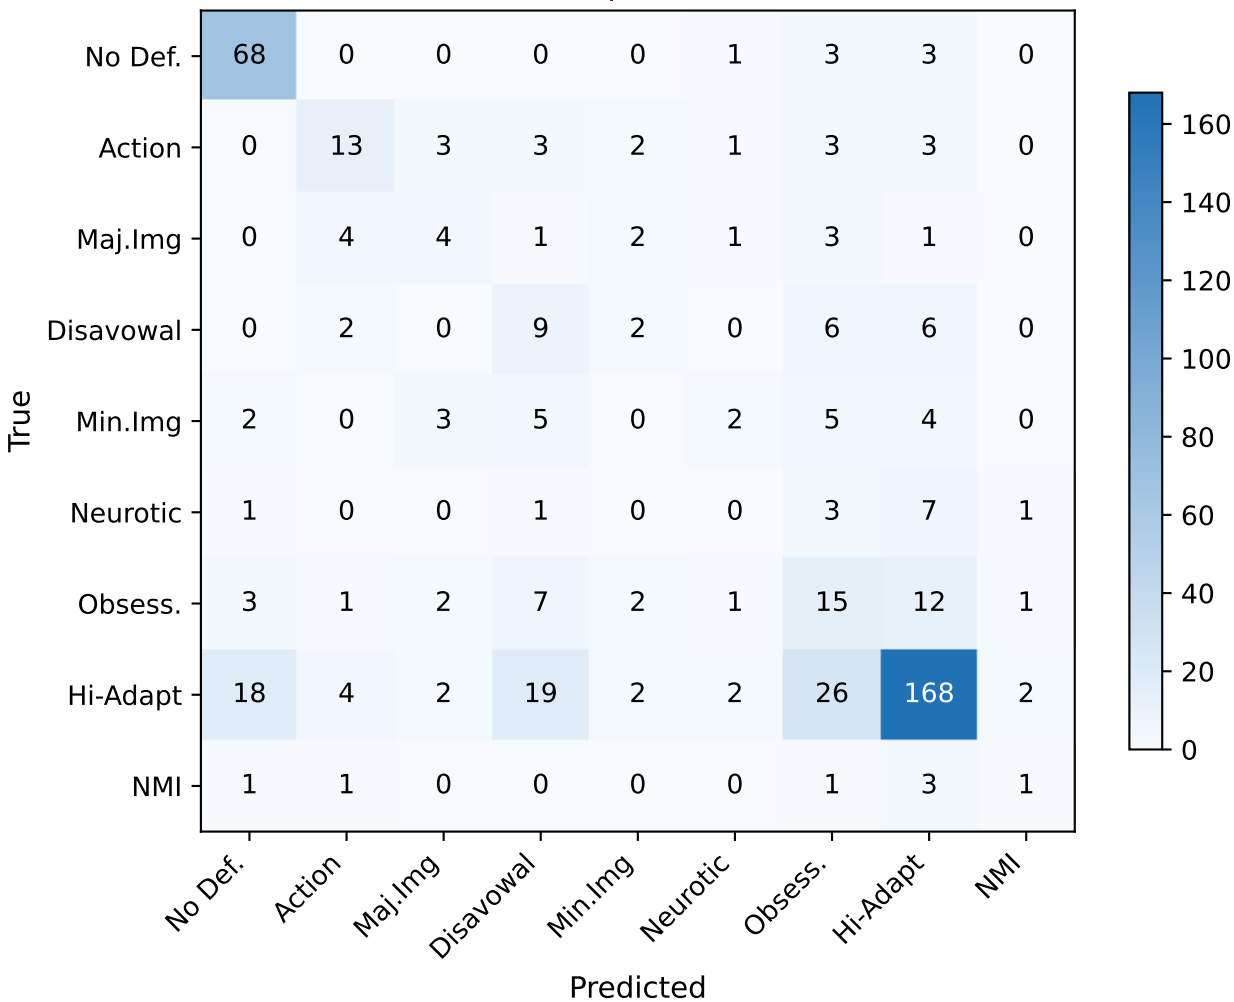

Supplement: SupplementaryMaterial [file 02_ft_confusion_Qwen3-1.7B_Best_Fold_2.pdf › AlienAnnotators_TeX/plots/02_ft_confusion_Qwen3-1.7B_Best_Fold_2.pdf]

# Finetuned: Qwen3-1.7B — Logit Avg

Logit Avg | Macro F1=0.346

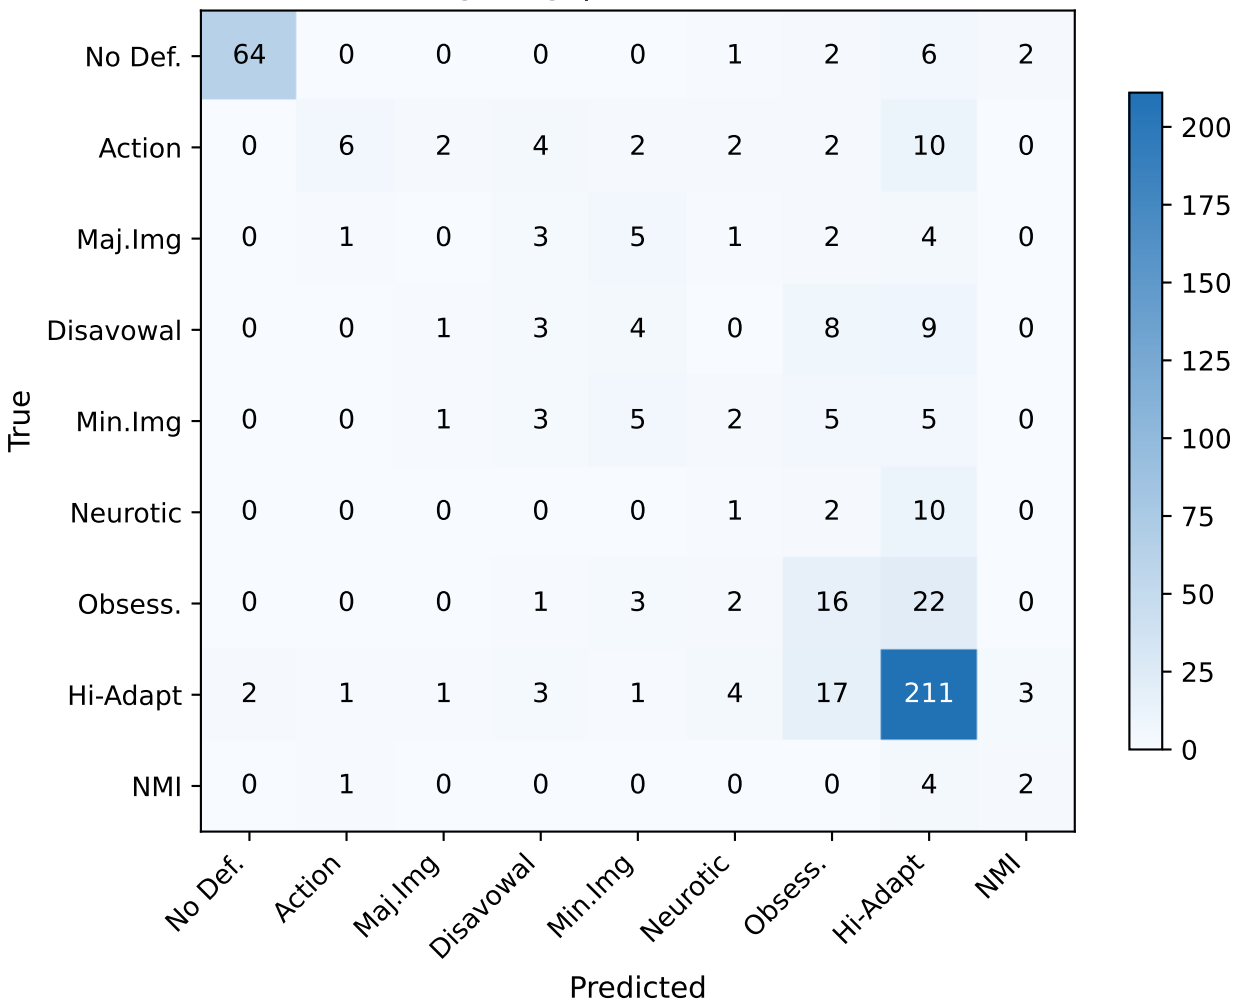

Supplement: SupplementaryMaterial [file 02_ft_confusion_Qwen3-1.7B_Logit_Avg.pdf › AlienAnnotators_TeX/plots/02_ft_confusion_Qwen3-1.7B_Logit_Avg.pdf]

# Finetuned: Qwen3-1.7B — Majority Vote

Majority Vote | Macro F1=0.323

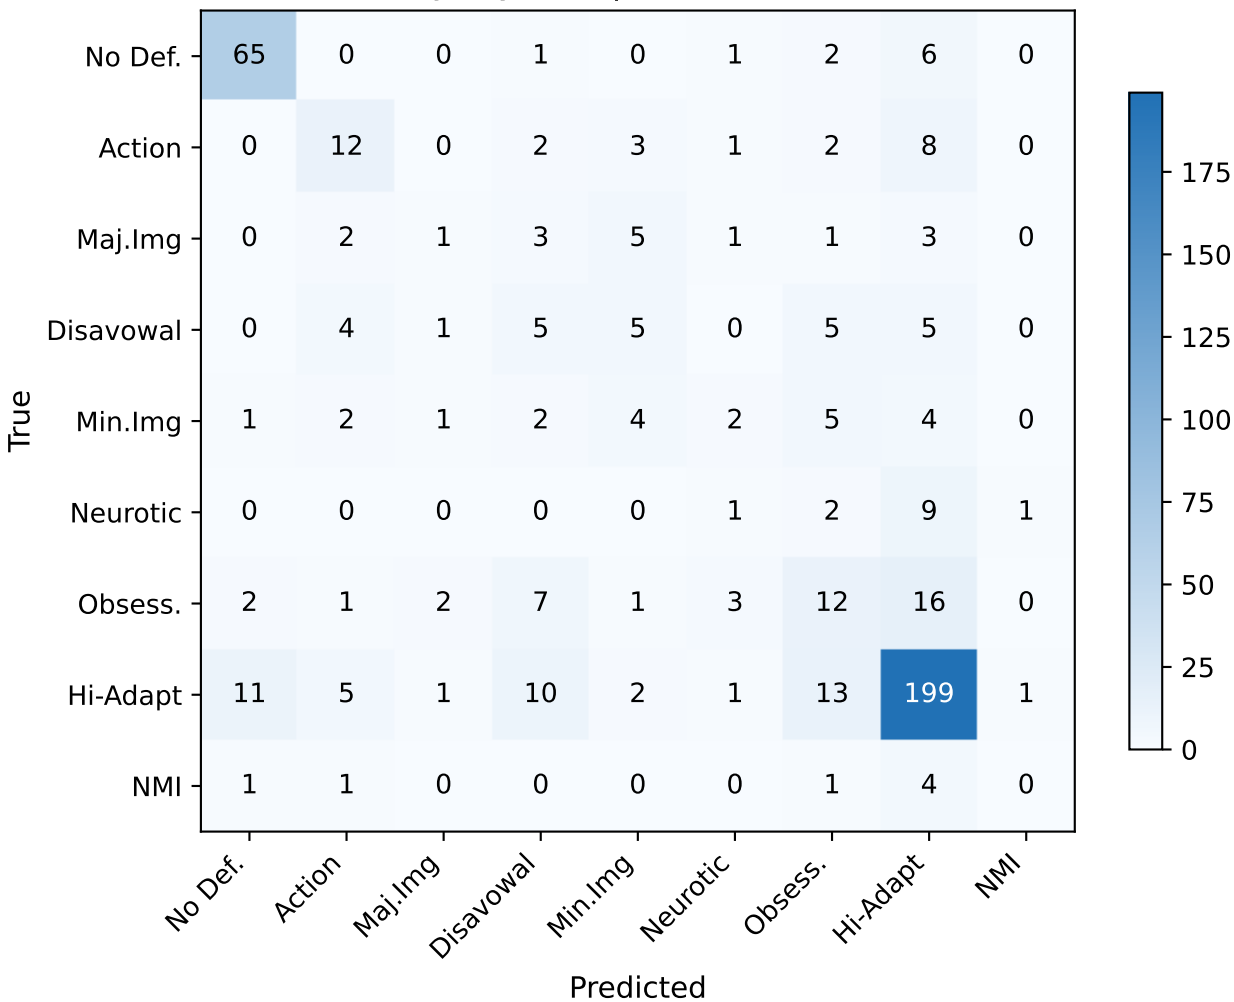

Supplement: SupplementaryMaterial [file 02_ft_confusion_Qwen3-1.7B_Majority_Vote.pdf › AlienAnnotators_TeX/plots/02_ft_confusion_Qwen3-1.7B_Majority_Vote.pdf]

# Per-Class F1 Score Heatmap — Zero-Shot Models

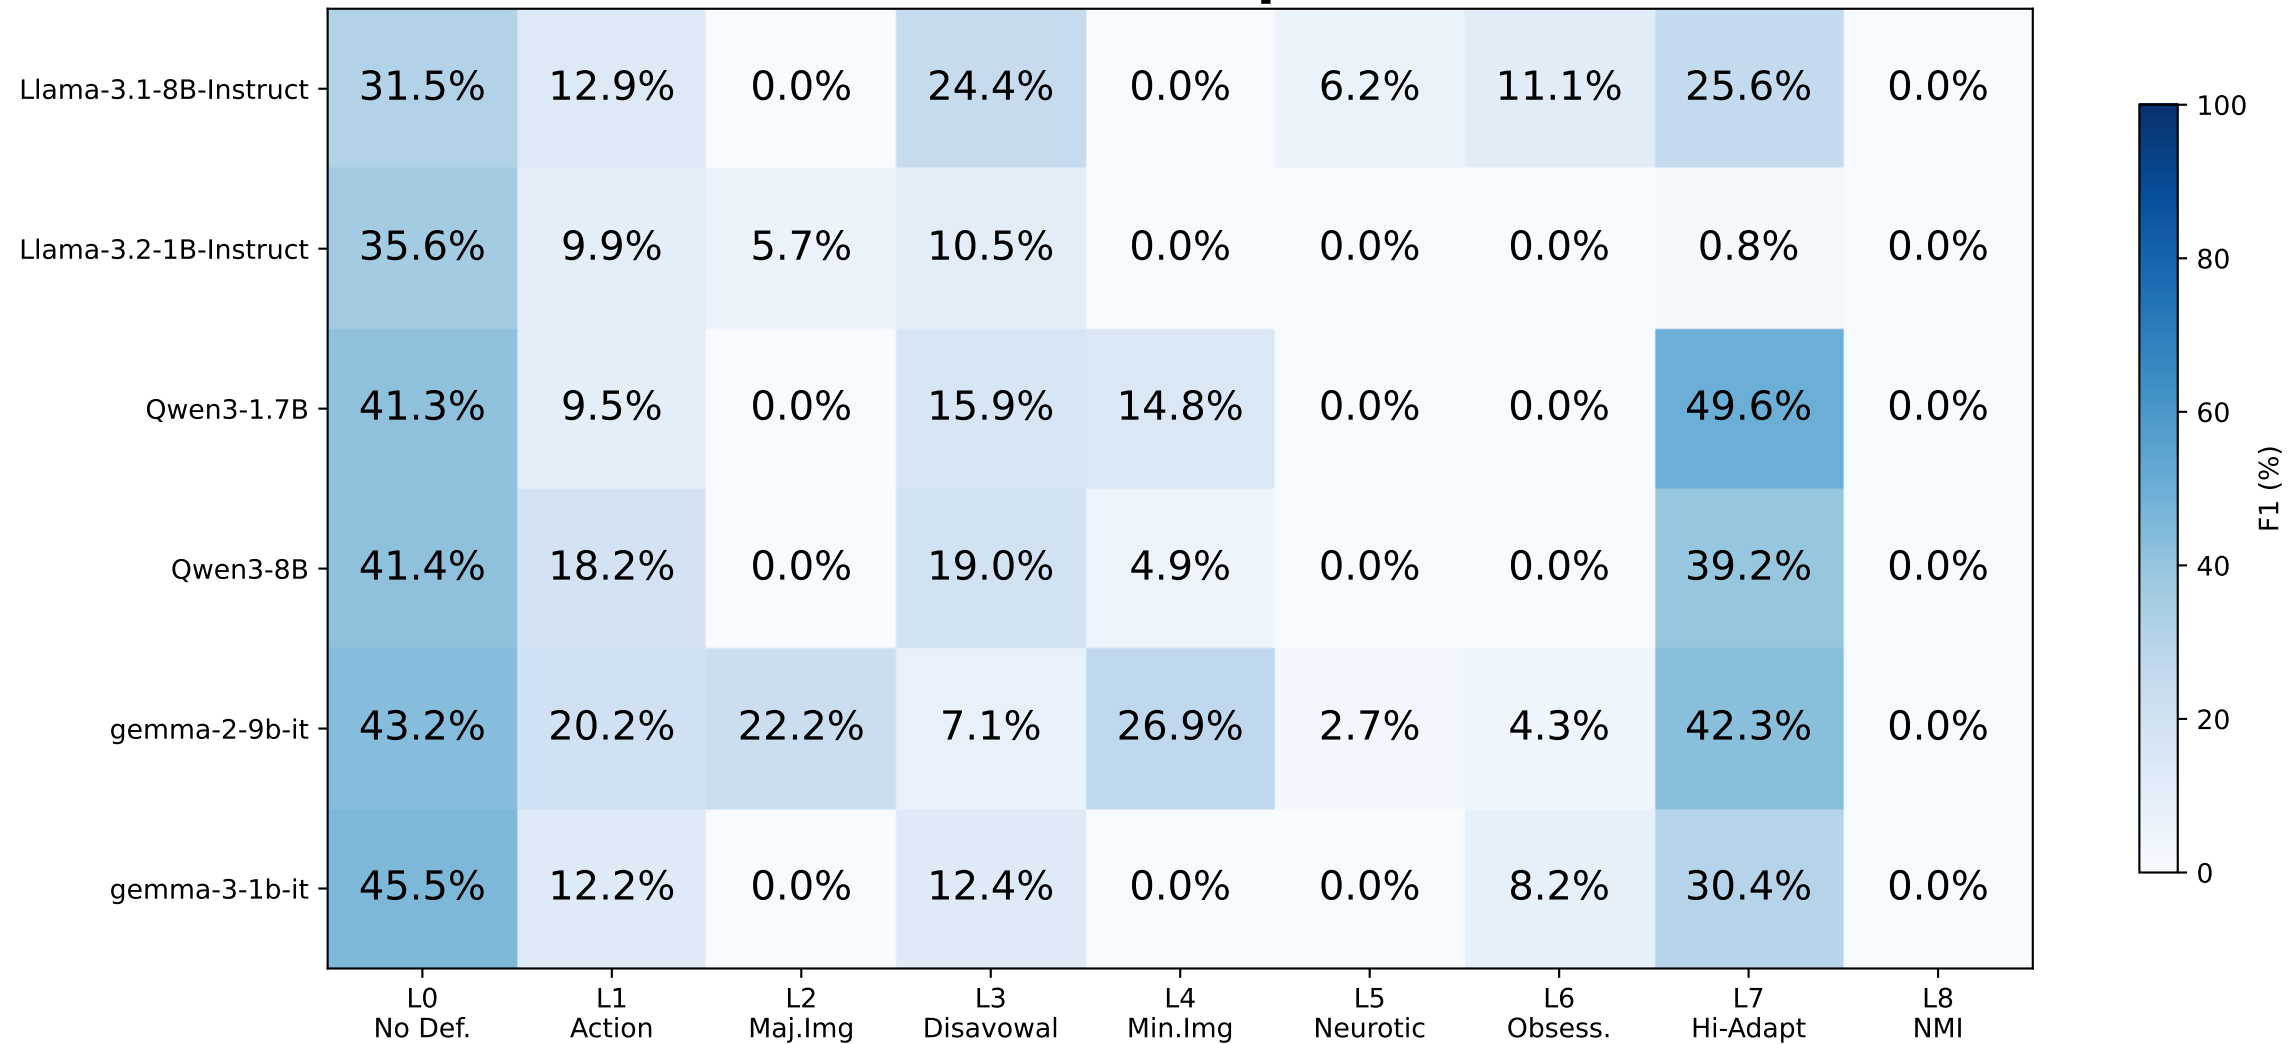

Supplement: SupplementaryMaterial [file 03_perclass_f1_heatmap_zeroshot.pdf › AlienAnnotators_TeX/plots/03_perclass_f1_heatmap_zeroshot.pdf]

# Zero-Shot vs Finetuned — Per-Class F1 Score

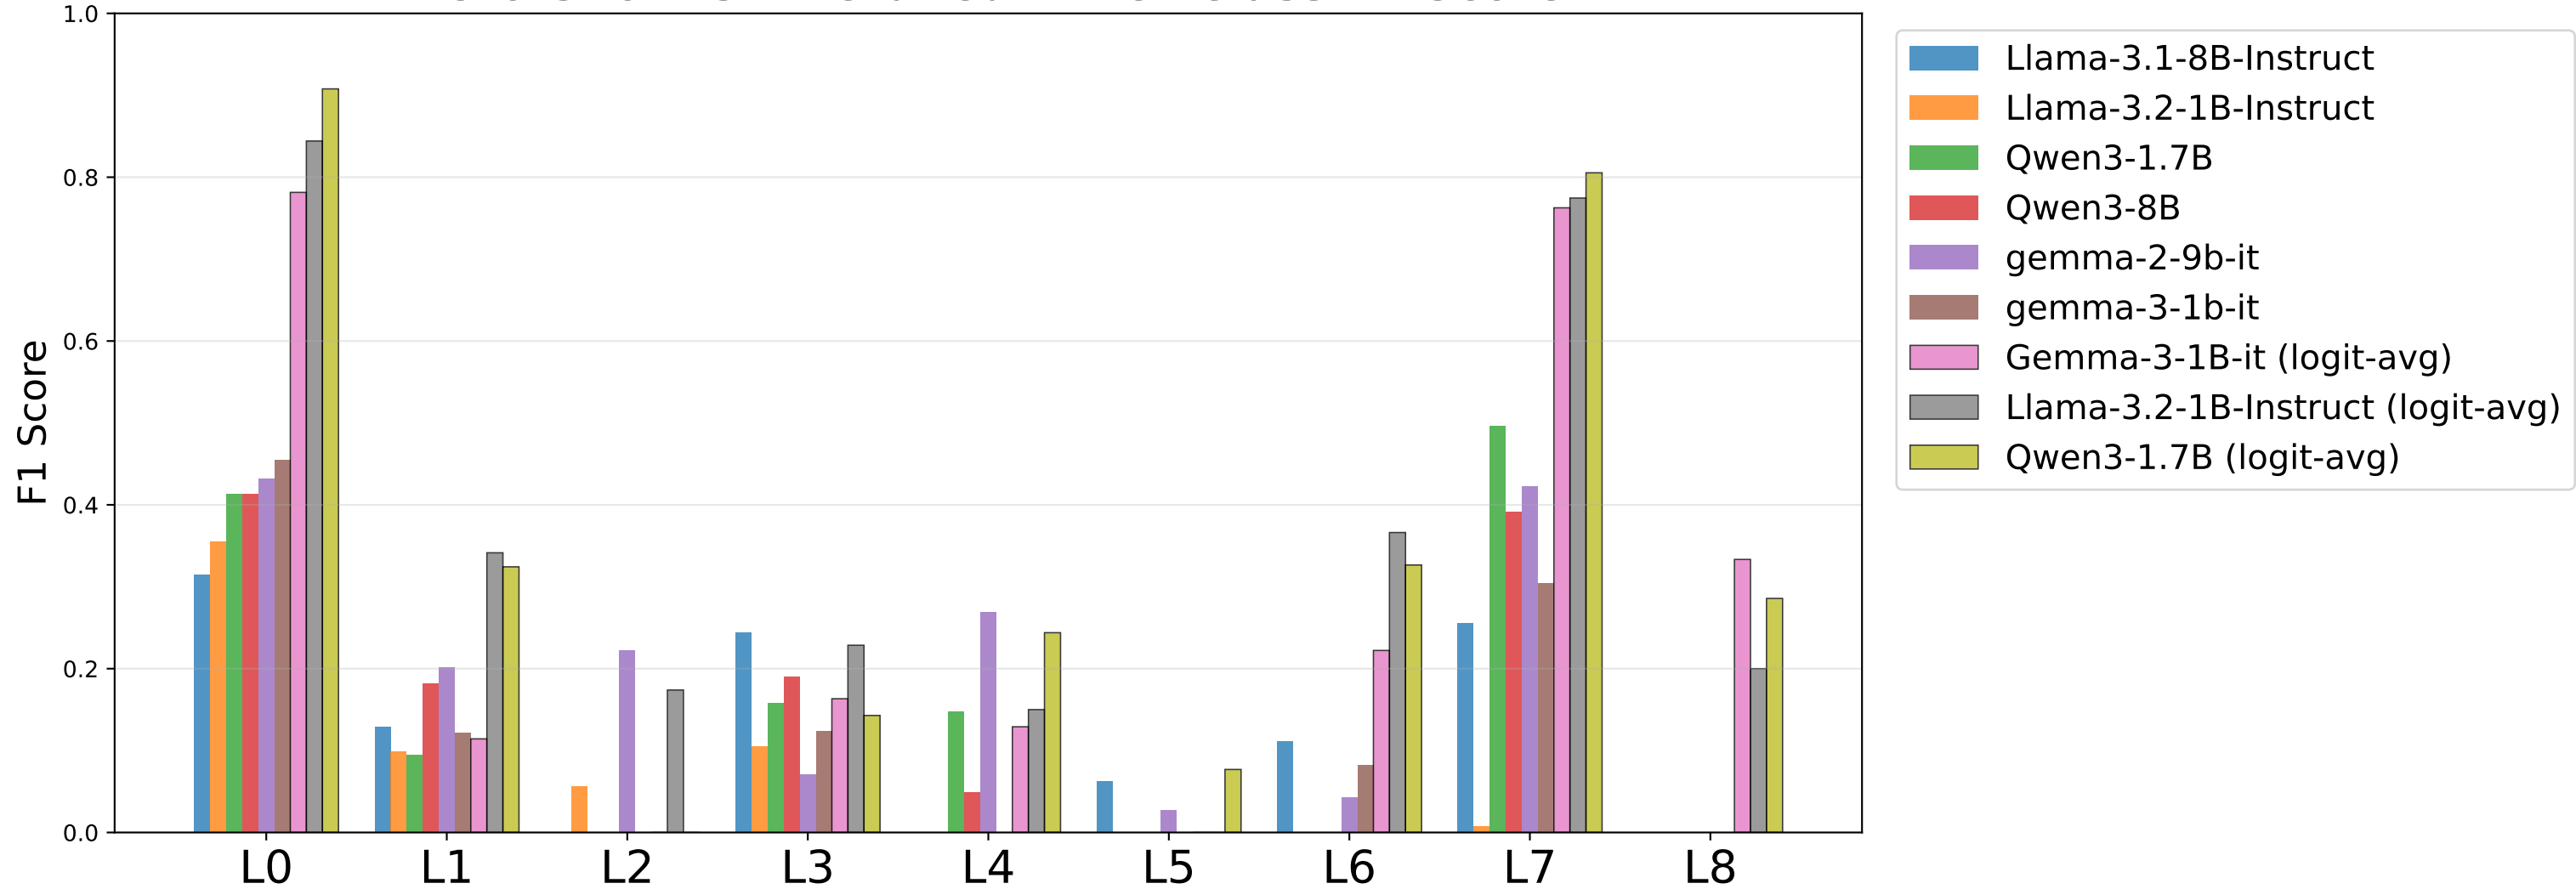

Supplement: SupplementaryMaterial [file 07_zs_vs_ft_perclass_f1.pdf › AlienAnnotators_TeX/plots/07_zs_vs_ft_perclass_f1.pdf]

# Scale Effect — Gemma: Small vs Large

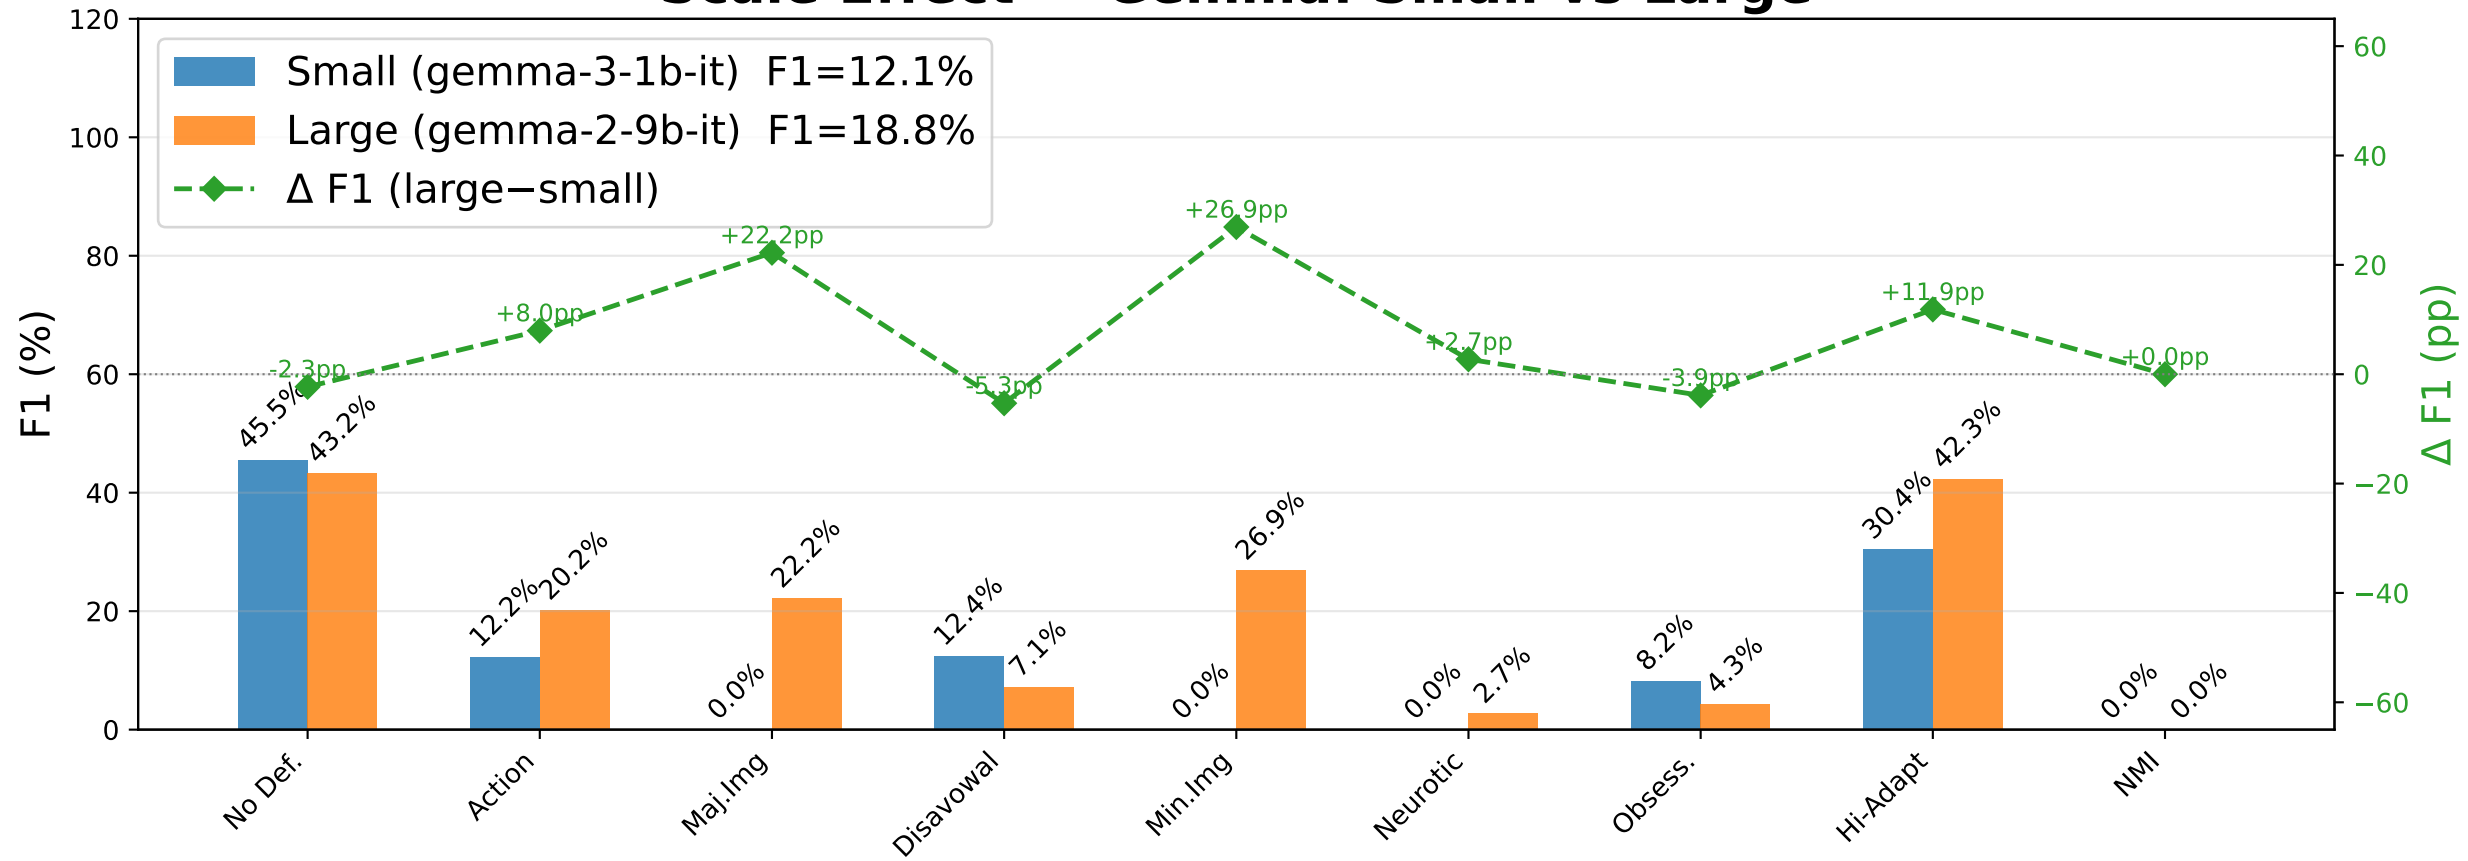

Supplement: SupplementaryMaterial [file 08_scale_effect_Gemma.pdf › AlienAnnotators_TeX/plots/08_scale_effect_Gemma.pdf]

# Scale Effect — Llama3: Small vs Large

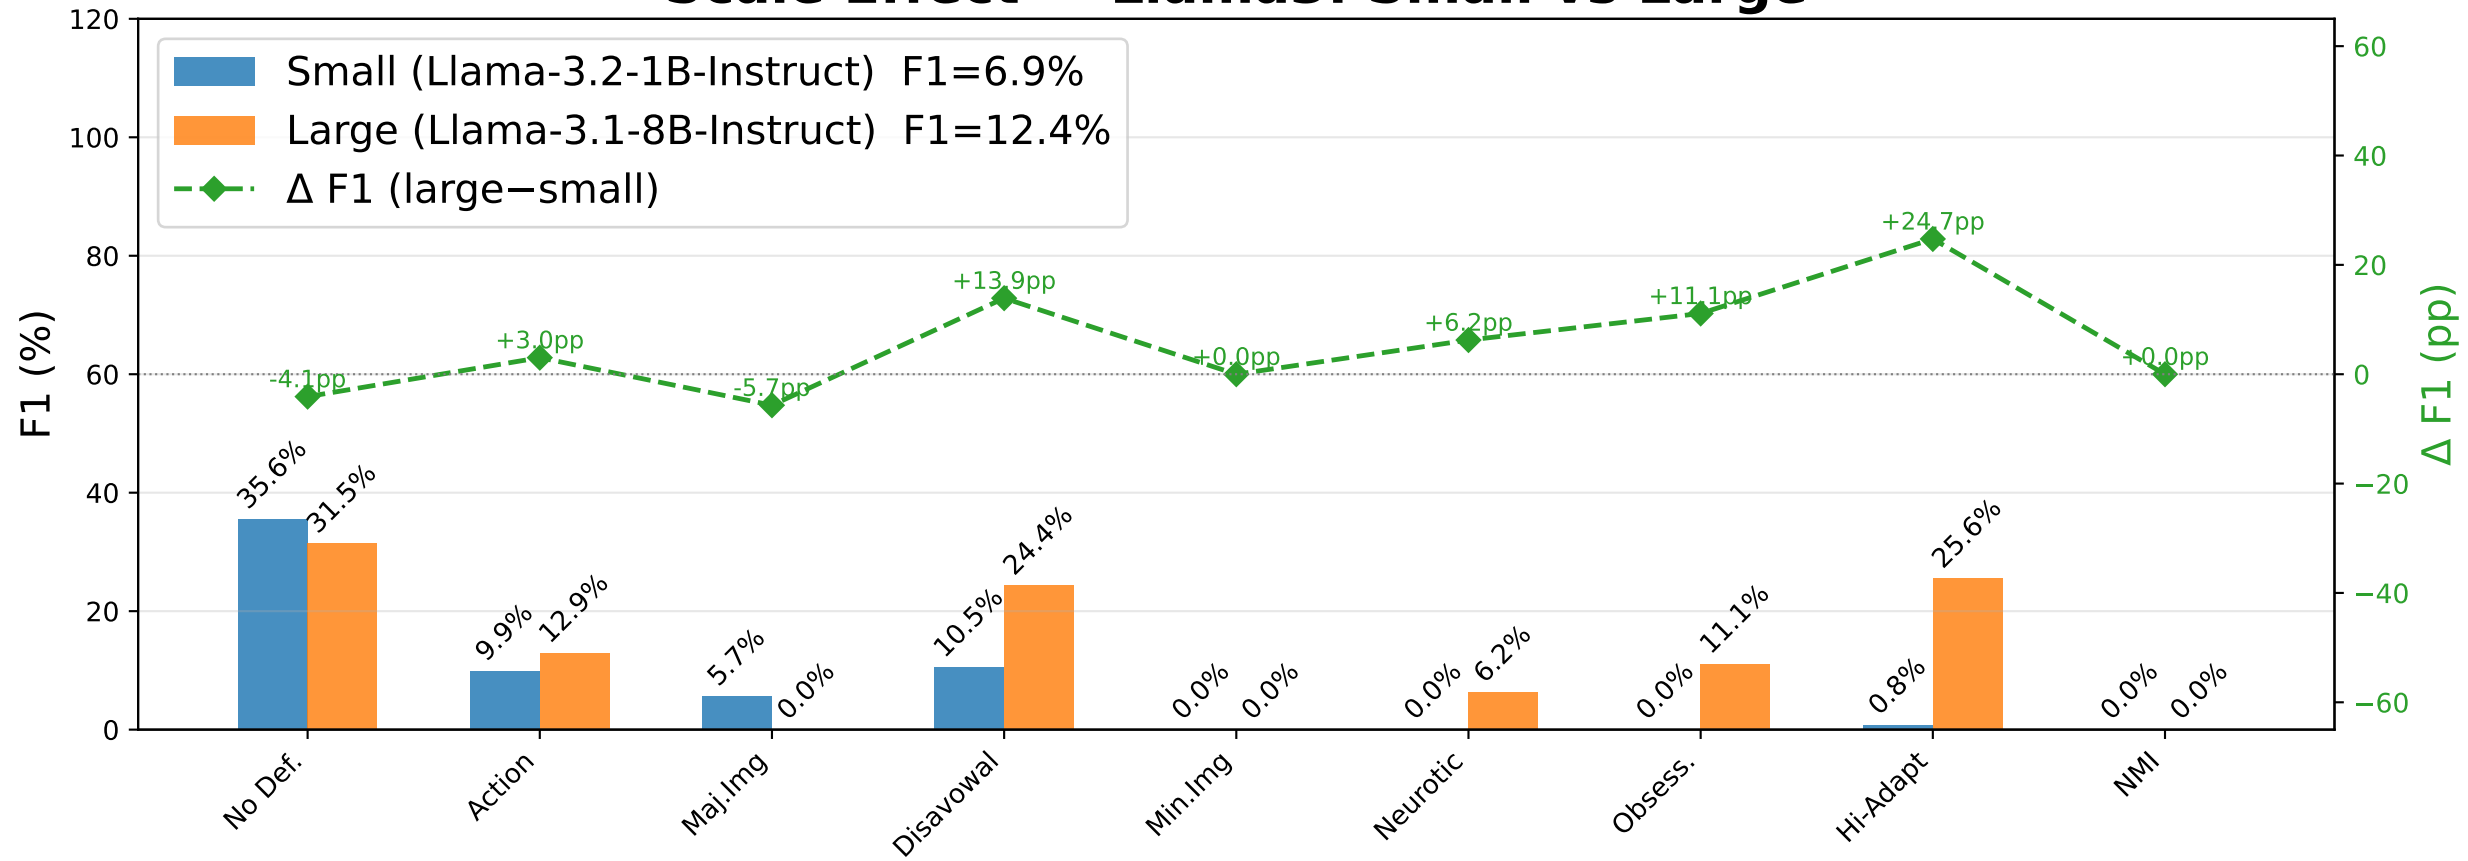

Supplement: SupplementaryMaterial [file 08_scale_effect_Llama3.pdf › AlienAnnotators_TeX/plots/08_scale_effect_Llama3.pdf]

# Scale Effect — Qwen3: Small vs Large

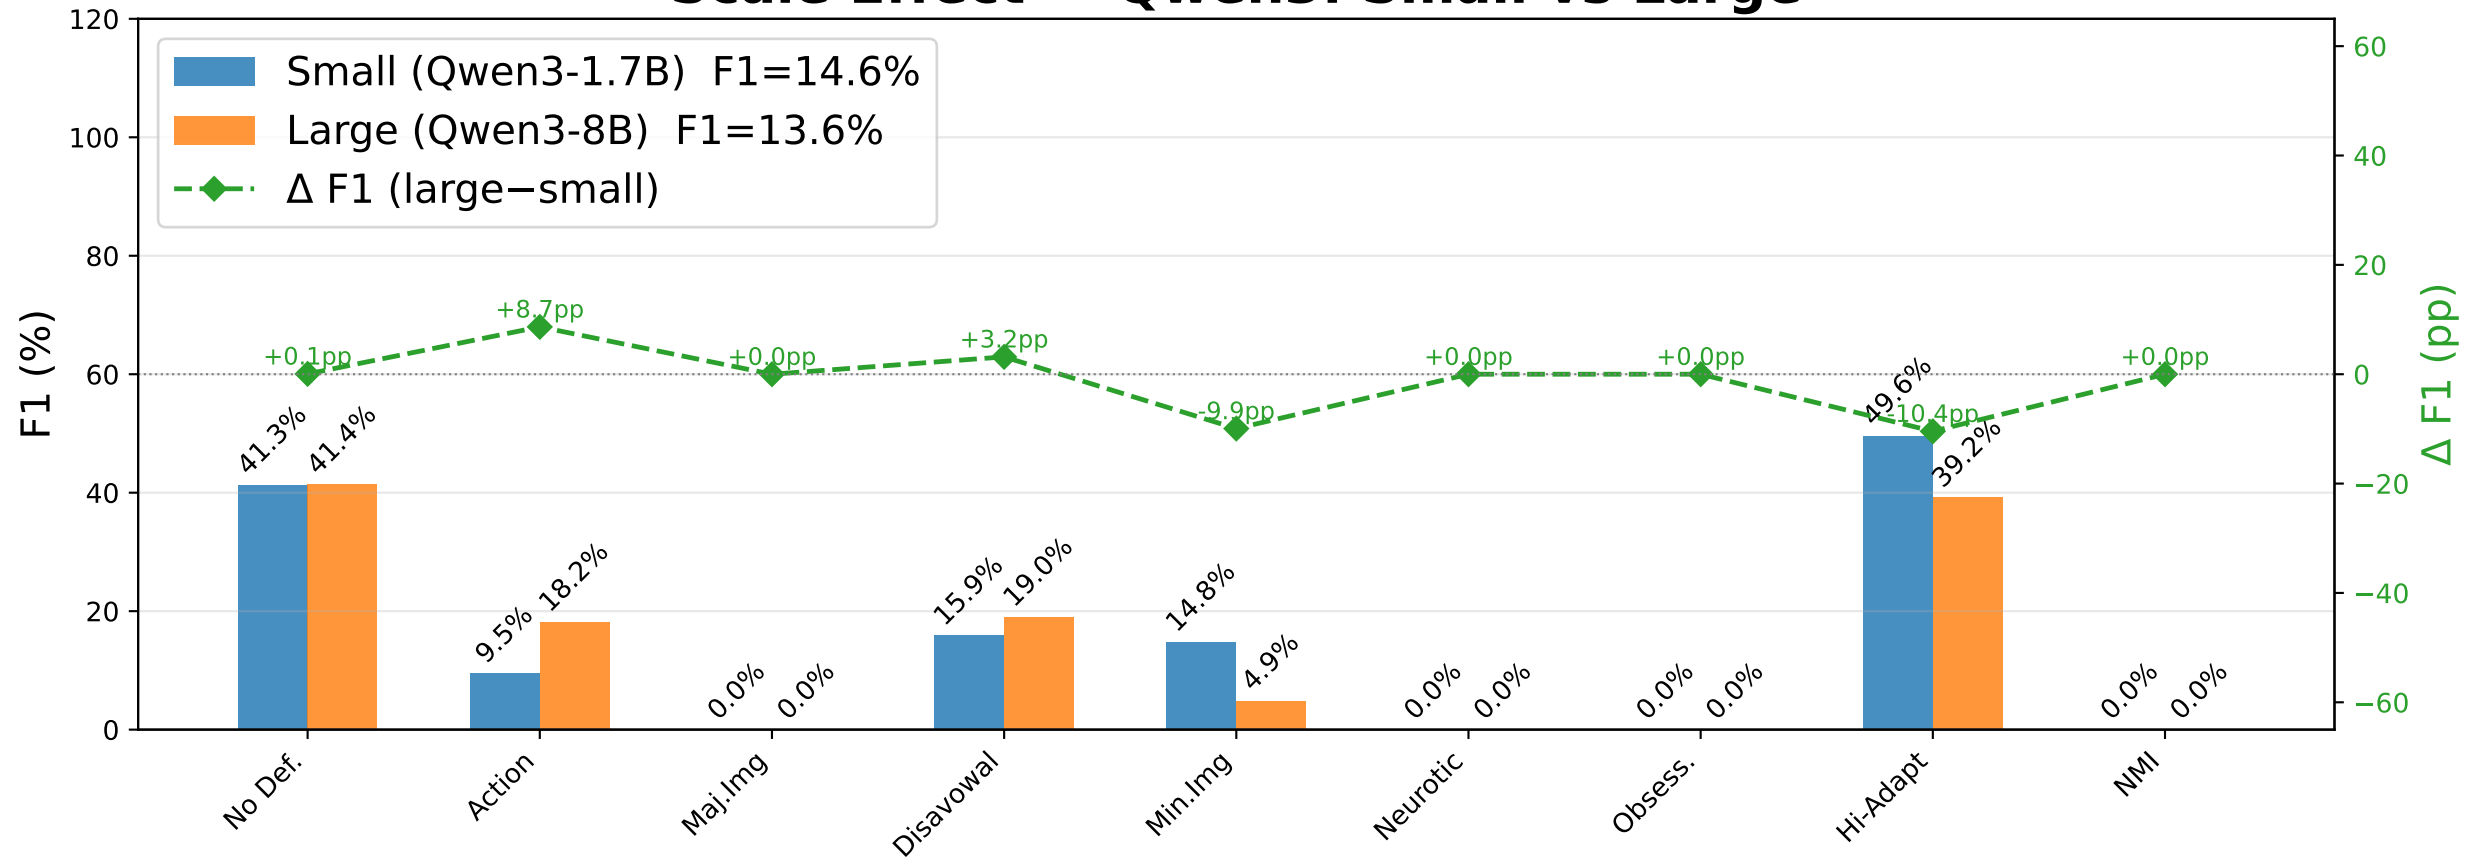

Supplement: SupplementaryMaterial [file 08_scale_effect_Qwen3.pdf › AlienAnnotators_TeX/plots/08_scale_effect_Qwen3.pdf]
